1 **100+ years of bird survey data reveal changes in functional fingerprints indexing ecosystem health**  
2 **of a tropical montane forest through time**

3  
4 \*Camila Gómez<sup>1,2</sup>, Elkin A. Tenorio<sup>3,4,5</sup>, Carlos Daniel Cadena<sup>6</sup>

5 <sup>1</sup>*Cornell Lab of Ornithology, Ithaca, NY - USA*

6 <sup>2</sup>*SELVA: Investigación para la Conservación en el Neotropico, Bogotá – Colombia*

7 <sup>3</sup>*The Graduate Center, City University of New York, New York, NY 10016, USA.*

8 <sup>4</sup>*Department of Ornithology, American Museum of Natural History, Central Park West at 79th Street,*  
9 *New York, NY 10024, USA.*

10 <sup>5</sup>*Instituto de Investigación de Recursos Biológicos Alexander von Humboldt, Bogotá - Colombia*

11 <sup>6</sup>*Laboratorio de Biología Evolutiva de Vertebrados, Departamento de Ciencias Biológicas Universidad*  
12 *de Los Andes, Bogotá – Colombia*

13 \*Corresponding author: [camila.gomez@selva.org.co](mailto:camila.gomez@selva.org.co)

14

15 **Acknowledgements**

16 We dedicate this paper to the memory of Gustavo H. Kattan, who spearheaded studies of changes in bird  
17 assemblages in San Antonio and contributed enormously to Neotropical ecology and conservation  
18 through his career. Because of Gustavo's untimely passing we were unable to share this work with him  
19 and to invite him to contribute as a coauthor.

20 J. Von Rothkirch, M. L. Mahecha and Y. Caicedo contributed with specimen measurements; A. M.

21 Cuervo , Glenn Zeeholzer, Amanda Rodewald's Lab group and Daniel Cadena's Lab group provided

- 22 excellent feedback; The following scientific collections allowed access to bird specimens: IAvH, ICN,
- 23 Museo de La Salle, Museo Univalle, AMNH.

## 24 **Abstract**

25 Ecologically relevant traits of organisms inhabiting an ecosystem determine its functional fingerprint.  
26 Quantifying changes in the shape, volume and shifts in the position of functional fingerprints can provide  
27 information about the effects of diversity loss or gain through time, and is a promising means to monitor  
28 ecological integrity. This, however, is seldom possible owing to limitations in historical surveys and lack  
29 of data on organismal traits, particularly in diverse tropical regions. Using detailed bird surveys from four  
30 time periods across more than one century and morphological traits of 233 species, we quantified changes  
31 in the avian functional fingerprint of a tropical montane forest site in the Andes of Colombia. We found  
32 that 79% of the variation in functional space, regardless of time period, was described by three major axes  
33 summarizing body size, dispersal ability, and habitat breadth. Changes in species composition caused  
34 significant alterations of the functional fingerprint of the assemblage, with 35 – 60% reductions in  
35 functional richness and dispersion. Owing to species extirpations and to novel additions to the  
36 assemblage, functional space is currently smaller and at least 11% different to what it was a century ago,  
37 with fewer large-sized species, more good dispersers, and fewer habitat specialists. Extirpated species had  
38 high values of functional uniqueness and distinctiveness, resulting in large reductions of functional  
39 richness and dispersion after their loss, implying potentially important consequences for ecosystem  
40 functioning. Conservation efforts aimed at maintaining ecosystem function must move beyond  
41 maintaining species numbers to designing strategies for the maintenance of ecological function by  
42 identifying and conserving species with traits conferring high vulnerability.

43 **Key words:** *birds, Colombia, ecological integrity, fragmentation, functional richness, functional*  
44 *uniqueness*

## 45 **Introduction**

46 Determining how changes in the natural world affect ecosystems and the biodiversity within them is  
47 essential, especially if we are to maintain ecosystem function and restore degraded habitats to regain

48 services they once provided (Cadotte et al. 2011; Dirzo et al. 2014). First, however, we must understand  
49 what defines healthy ecosystems in terms of function, and how ecosystems change naturally or in  
50 response to human intervention. Functional traits, defined as ecological, morphological or behavioral  
51 traits influencing fitness and survival of organisms (Violle et al. 2007), mediate ecosystem processes, and  
52 determine the responses of populations to environmental conditions, biotic interactions and nutrient  
53 cycling in ecological assemblages (Bregman et al. 2016; Funk et al. 2017). Therefore, measures of  
54 diversity in functions provide information about ecosystem health because higher functional diversity is  
55 associated with greater plasticity, productivity, and resilience when facing disturbances or climatic  
56 fluctuations (Mason et al. 2005; Cadotte et al. 2011). Examining changes in functional diversity within  
57 assemblages known to have changed in species composition through time offers an opportunity to  
58 understand the consequences that impacts on biodiversity have on the functions and services it provides.

59         Measures of functional diversity are often quantified as a multidimensional volume, where each  
60 species occupies a position depending on its similarity to others. In this volume, species with similar trait  
61 values (i.e. functionally redundant species) are located in the center close to other species, whereas  
62 functionally distinctive species are far from the rest in the periphery (Mason et al. 2005; Ricklefs 2012;  
63 Kuebbing et al. 2018). The shape of the multi-dimensional trait space formed by organisms inhabiting an  
64 ecosystem hence determines a unique “functional fingerprint”. Quantifying changes in the shape, volume  
65 and shifts in the position of functional fingerprints can therefore provide information about the effects of  
66 diversity loss or gain, and is a promising means to monitor ecological integrity (Carmona et al. 2016;  
67 Pigot et al. 2016; Cooke et al. 2019b).

68         In response to environmental changes, the functional fingerprint of an assemblage may remain  
69 unchanged, shift in different directions, or change in shape and volume. For instance, if an assemblage  
70 loses or gains species far from others in functional space, then its functional richness (i.e. the total  
71 functional space it occupies) would change more drastically than if it lost or gained species occupying  
72 similar areas of trait space relative to other members of the assemblage (Carmona et al. 2016; Grenié et al.

73 2017; Kuebbing et al. 2018). Similarly, whether lost or gained species are located close or far from the  
74 centroid of trait space will determine the effect of changes on functional dispersion (i.e. the mean distance  
75 of each species to the centroid of trait space; Laliberte & Legendre 2010), with extirpations of species in  
76 the periphery of functional volume causing greater decreases in functional dispersion (Laliberte &  
77 Legendre 2010). Finally, changes in abundance of species in an assemblage can also impact its functional  
78 dispersion by shifting the center of gravity towards the most abundant traits (Laliberte & Legendre 2010).  
79 Changes in functional shape or volume would therefore depend on characteristics of the species changing  
80 in abundance relative to the rest of the assemblage (Carmona et al. 2016).

81         Birds are good indicators of ecosystem health because they rapidly respond to environmental  
82 changes, and because variations in bird assemblages can be readily assessed by human observers (e.g.  
83 Gregory & van Strien 2010; Bregman et al. 2016). Furthermore, the link between avian functional traits  
84 and ecosystem processes is well documented (Maglianesi et al. 2015; Ikin et al. 2019; Pigot et al. 2020).  
85 Although many studies have documented changes in bird assemblages through time as a response to  
86 habitat or climate change (e.g. Renjifo 1999; Robinson 1999; Freeman et al. 2018; Rosenberg et al. 2019),  
87 determining whether ecosystem health is affected by changes in species diversity and abundance requires  
88 assessing whether changes extend to functional spaces.

89         Studies of the temporal dynamics of functional diversity within ecological assemblages indicate  
90 that extinctions and colonizations of species are not random in terms of their functional traits (Petchey et  
91 al. 2007), and changes in functional space characterize succession in ecological assemblages (Purschke et  
92 al. 2013). Responses to habitat and landscape changes also affect functional groups differentially and  
93 produce changes in interspecific interactions which affect ecosystem function at different scales  
94 (Chalmandrier et al. 2015; Jarzyna & Jetz 2018; Stouffer 2020). Furthermore, changes in functional  
95 diversity after habitat fragmentation may homogenize traits within assemblages, implying loss of unique  
96 functions (Clavel et al. 2011; Jarzyna & Jetz 2017). However, studies quantifying long-term changes in  
97 the multidimensional functional fingerprint of tropical assemblages are lacking.

98           The avifauna of San Antonio, a montane forest locality in the Andes of Colombia, poses an  
99   unprecedented opportunity to examine shifts in functional fingerprints through time in a highly diverse  
100   tropical ecosystem, and thereby to infer how species extirpations and recolonizations may have influenced  
101   ecosystem health. San Antonio was first surveyed by naturalists in the 1910's (Chapman 1917). Since  
102   then, exhaustive resurveys conducted in the 1950's, 1990's and 2000's have allowed researchers to  
103   document substantial changes in composition of the bird assemblage over more than a century of  
104   landscape change (Kattan et al. 1994; Palacio et al. 2019). We combined morphological and ecological  
105   data for the complete bird assemblage of San Antonio, comprising 233 species, to test the hypothesis that  
106   functional fingerprints changed as a result of gains, losses and changes in abundance of functionally  
107   distinctive species. We expected functional richness and dispersion to have decreased between the early  
108   1910's and the 1990's when several species extirpations occurred (Kattan et al. 1994), and to have  
109   increased following recovery of some species and colonization by formerly absent species in the 2000's  
110   (Palacio et al. 2019). We also evaluated whether colonization by novel species caused changes in the  
111   functional fingerprint of the San Antonio assemblage, filling areas of functional space not occupied by the  
112   set of species coexisting in the area in the 1910's. If extirpated species were functionally unique, then this  
113   system may have lost functions provided by those species and potentially gained others from the novel  
114   colonizers. Alternatively, if extirpated species or novel colonizers were functionally redundant, then the  
115   overall functionality of the system may not have changed significantly.

116

## 117   **Methods**

118   **Study site.**- The *Cerro de San Antonio* is a mid-elevation mountain ridge (1700 - 2200 m), located in  
119   Colombia's Western Andes (3.4960 N, -76.6305 W) approximately 15 km west of Cali, Valle del Cauca  
120   (Kattan et al. 1994; Palacio et al. 2019). This region (covering ~7000 ha) originally harbored extensive  
121   tropical montane and cloud forests, which suffered widespread fragmentation from the 1930's to the  
122   1960's resulting in a ~46% reduction in forest cover (Kattan et al. 1994; Palacio et al. 2019). Since then,

123 the remaining matrix of forest fragments, small farms and country houses has remained relatively stable,  
124 with an estimated ~10% increase in forest cover between 1995 and 2016 (Palacio et al. 2019).

125 ***Historical and contemporary bird survey data.***- We analyzed data based on published bird lists from San  
126 Antonio compiled by Palacio et al. (2019), which comprise a total of 233 species detected across surveys  
127 conducted between 1907 and 2016 (Appendix S1). We divided data into 4 periods: (1) the 1910's,  
128 corresponding to surveys led by Frank M. Chapman and Mervin G. Palmer; (2) the 1950's, by Alden H.  
129 Miller; (3) the 1990's, by Gustavo Kattan et al.; and (4) the 2000's, by Ruben Palacio et al. Detailed  
130 methodologies for these surveys can be found in the original publications (Chapman 1917; Miller 1963;  
131 Kattan et al. 1994; Palacio et al. 2019) and together they comprise an accurate representation of the  
132 avifauna of San Antonio and its compositional changes over 100+ years. For details on changes in the  
133 avifauna during these time periods see Appendix S3.

134 Surveys in the 1910's consisted exclusively of collecting expeditions (Chapman 1917) but from  
135 the 1950's onwards, surveys combined standardized observations with collecting, and the most recent  
136 surveys in the 2000's also integrated citizen-science data (Kattan et al. 1994; Palacio et al. 2019).  
137 Methodological differences between surveys imply that we have strong certainty about species  
138 extirpations occurring between time periods but are less certain about novel species colonizations because  
139 the older surveys were more likely to have missed species which were actually present but not identified  
140 or collected due to limited knowledge of bird songs, lack of good binoculars, etc.. To address this issue,  
141 we analyzed our data considering two scenarios. The first assumes that all surveys accurately describe the  
142 avifauna present and that any records of species not detected in prior surveys of San Antonio represent  
143 real colonizations. The second, more conservative scenario, assumes that all the 'novel species', i.e. those  
144 detected for the first time after the 1910's, were false absences and so we added them to the 1910's list.  
145 Therefore, under Scenario 2 any changes in the avifauna consisted exclusively of extirpated species or re-  
146 colonization of previously extirpated species. What actually occurred likely lies somewhere in the middle  
147 of our two scenarios.

148 **Functional traits.**- For all 233 species, we compiled information on 9 traits describing functional  
149 morphospace and ecological strategies (Cooke et al. 2019b; Habel et al. 2019; Pigot et al. 2020; Sheard et  
150 al. 2020): body mass, bill length, bill width, wing chord, tail length, tarsus length, hand-wing index (i.e. a  
151 measure of wing shape), habitat breadth and generation time (BirdLife International 2018; Appendix S1).  
152 We also made sure most of the traits considered had low values of correlation within our assemblage  
153 (72% of traits have correlation coefficients  $< 0.6$ , supplementary Fig. S3.1 in Appendix S3; Cadotte et al.,  
154 2011). For additional details on functional trait compilation see Appendix S3.

155 **Estimation of functional diversity metrics and temporal comparisons.**- Body mass was  $\log_{10}$   
156 transformed, and all traits were scaled and centered to have zero mean and unit variance (Cadotte et al.  
157 2011; Carmona et al. 2016; Cooke et al. 2019a). To obtain a reduced set of uncorrelated variables  
158 explaining variation in functional traits, we ran a principal components analysis using data from all  
159 species (R Development Core Team 2019). Out of nine principal components, the first three explained  
160 78% of the variation in functional trait values. Loadings suggested that PC1 described mostly variation in  
161 body size (55%), PC2 was related to dispersal ability through the hand-wing index (13%) and PC3  
162 described habitat breadth (11%; Appendix S3). The first 3 PC scores were then used as axes to compare  
163 functional spaces among time periods and groups of species (Carmona et al. 2016; Cooke et al. 2019b).

164 We adopted methods from Cooke et al. (2019) to construct functional spaces and evaluate  
165 temporal shifts in the San Antonio avifauna since the 1910's. Two and three-dimensional trait spaces are  
166 constructed by comparing different combinations of trait-space values, in this case PC1, PC2 and PC3  
167 (Cooke et al., 2019). Multivariate kernel density estimates (Duong 2019) were used to calculate the 0.5,  
168 0.95 and 0.99 probability contours for trait spaces (Cooke et al. 2019b). Scores from PC's comprising  
169 ~95% of variance were used to construct a trait hypervolume to visualize temporal shifts in functional  
170 space and to calculate changes in volume and overlap between time periods. The hypervolume was  
171 constructed following Cooke et al. (2019) using a 'one-class support vector machine (SVM)' method  
172 (Blonder & Harris 2019).



173 Historical and contemporary relative abundances of species from San Antonio were extracted  
174 from Palacio et al. (2019). We assigned a value between 0 and 1 to each abundance category where 0 =  
175 absent or extirpated, 0.2 = rare, 0.4 = uncommon, 0.6 = fairly common, 0.8 = common, and 1 = abundant.  
176 We constructed a period-by-species matrix with these relative abundance values, and a species-by-trait  
177 matrix with the standardized values of our 9 functional traits. We then estimated functional richness and  
178 dispersion using function 'dbFD' in R package 'FD' (Villegger et al. 2008; Laliberte & Legendre 2010;  
179 Laliberté et al. 2014). Functional richness (*FRic*) was estimated as the volume of the minimum convex  
180 hull (Villegger et al. 2008). For ease of interpretation, the functional richness of each time period was  
181 standardized by the global *FRic*, thus constraining values to range between 0 and 1 (Laliberté et al. 2014).  
182 Functional dispersion (*FDis*) is the mean distance of each species to the centroid of trait space, weighted  
183 by its relative abundance (Laliberte & Legendre 2010). *FDis* increases as the most abundant trait values  
184 are further from the center of gravity of trait space (Laliberté et al. 2014). The relative abundance  
185 categories for the historical datasets may be inaccurate because they do not account for collecting bias,  
186 i.e. an uncommon species in the collection might have been common in the assemblage. We therefore  
187 also estimated *FDis* without considering abundances.

188 To evaluate whether functional metrics for each time period were different from what might be  
189 expected through random processes, we compared observed values to those generated by null models. We  
190 randomly reordered the species-identity column of the abundance matrix 999 times (thus breaking  
191 associations between traits and species' identities), and then recalculated *FRic*, and *FDis* for each random  
192 assemblage (Van de Perre et al. 2020). To assess the magnitude of the difference between observed and  
193 null values of *FRic* and *FDis*, we estimated standard effect sizes as:  $SES = \frac{obs - meanNull}{SD Null}$  (Van de Perre  
194 et al. 2020) and assessed significance with *P* values as:  $\frac{(Number\ F_{null} \leq F_{obs} + 1)}{(999 + 1)}$  (Cooke et al. 2019a).

195 ***Functional characteristics of extirpated species and novel colonizers.***- To describe functional  
196 differences among 1. extirpated species, 2. novel additions to the assemblage as of the 2000's, and 3.

197 shared species maintained through time, we constructed trait probability density curves (TPD), using the  
198 first three PC axes as traits, and the aforementioned species groups as ecological units for comparison in  
199 package ‘TPD’ (Carmona et al. 2016, 2019). We used a two-sample Kolmogorov-Smirnov test to assess  
200 whether there were differences between TPD’s of extirpated species and novel additions to the  
201 assemblage.

202         Additionally, to evaluate whether extirpated species and those establishing new populations in  
203 San Antonio were functionally redundant or unique, we calculated functional distinctiveness and  
204 uniqueness using package ‘funrar’ in R (Grenié et al. 2017; Pimiento et al. 2020). Functional  
205 distinctiveness ( $D_i$ ) measures how uncommon a species’ trait value is compared to other species in the  
206 assemblage, weighted by the species’ relative abundance, and has values between 0 (high functional  
207 redundancy), and 1 (low functional redundancy; Grenié et al. 2017). Functional uniqueness ( $U_i$ ) is the  
208 distance of each species to its nearest neighbor in the assemblage (Grenié et al. 2017). The closer  $U_i$  is to  
209 1, the further species  $i$  is to its closest neighbor (Grenié et al. 2017). We ran permutation tests to evaluate  
210 whether extirpated species and new additions to the assemblage were more functionally unique or  
211 distinctive than expected by chance (Pimiento et al. 2020), and carried out pairwise comparisons to assess  
212 differences between time periods (Cooke et al. 2019a).

213

## 214 **Results**

215 Under both assumed scenarios (1 – species were both extirpated and colonized the assemblage; and 2 –  
216 there were no novel colonizers), the center of abundance of two-dimensional morpho-spaces has remained  
217 in the same position, but both the shape and extent of trait space have changed over 100+ years (Fig. 1  
218 and supplementary Fig. S3.2). Extirpated species (both scenarios), as well as new colonizers (Scenario 1),  
219 are spread over functional space, but those located towards the periphery have been responsible for the  
220 most noticeable shape changes in functional space (Fig. 1 and supplementary Fig. S3.2).

221 Changes in functional space were also evident in trait density curves comparing extirpated  
222 species, novel additions, and shared species through time. Trait density curves for Scenario 1 showed that  
223 the San Antonio assemblage has seen a shift towards smaller-sized birds (k-s test  $D = 0.34$ ,  $P = 0.03$ , Fig.  
224 2A), and towards species with higher dispersal ability (k-s test  $D = 0.48$ ,  $P = 0.0008$ , Fig. 2B) and wider  
225 habitat breadths (i.e. fewer habitat specialists; k-s test  $D = 0.44$ ,  $P = 0.003$ , Fig. 2C). These shifts resulted  
226 in 34% of the functional hypervolume present in the 1910's being absent from the 2000's. In turn, 11% of  
227 the volume occupied by the 2000's assemblage was not occupied in the 1910's, and 55% has remained  
228 constant (Figure 2D). For Scenario 2, trait density curves for body size and dispersal ability showed  
229 similar shifts to those of Scenario 1 with the assemblage losing larger-sized birds (k-s test  $D = 0.39$ ,  $P =$   
230  $0.0003$ ) and some species with relatively low dispersal ability (k-s test  $D = 0.43$ ,  $P = 0.000$ ), but showing  
231 no significant shifts in habitat breadths of species (i.e. PC3; k-s test  $D = 0.24$ ,  $P = 0.08$ ) (supplementary  
232 Fig. S3.3). Under Scenario 2, 29% of the trait hypervolume from the 1910's was lost, whereas only 1% of  
233 the hypervolume was unique to the 2000's and 70% remained constant across periods.

234 Changes in the hypervolume of all traits were comparable to measures of functional richness  
235 ( $FRic$ ) using the minimum convex hull. Under Scenario 1, between the 1910's and 1950's, functional  
236 richness decreased by ~36%, and it recovered ~22% between the 1990's and 2000's (Table 1, Figure 3A).  
237 Under Scenario 2, there was a ~66 % decrease in functional richness between the 1910's and 1990's  
238 (Table 1) and then a recovery of 12% during the 2000's (Table 1). Functional dispersion ( $FDIs$ ) followed  
239 a similar pattern in both scenarios (Table 1) with a decrease of ~8% between 1910's and 1950's and an  
240 increase of ~3% between the 1990's and 2000's (Table 1, Fig. 3B). The difference between values of  
241  $FDIs$  estimated with and without weighting for abundance were negligible (mean difference = 0.02,  
242 range = 0.003 – 0.05). All observed values of  $FRic$  and  $FDIs$  were lower than expected by chance, with  
243 negative standard effect sizes ranging from -0.87 to -2.81 (Fig. 3C).

244 Finally, we found that the San Antonio assemblage has lost a higher number of functionally  
245 unique and distinctive species than would have been expected by chance (Figs. 4A-B), and pairwise

246 comparisons between groups of species showed significant differences in functional distinctiveness and  
247 uniqueness between extirpated species and species remaining in the assemblage across time periods. For  
248 example, large frugivores, a group especially sensitive to extirpation, were among the highest ranked in  
249 functional distinctiveness and uniqueness (Fig. 4. and Appendix S3). Nine out of 32 novel additions to the  
250 assemblage (Scenario 1) also had relatively high values of functional distinctiveness and uniqueness, with  
251 the Ornate Hawk-Eagle (*Spizaetus ornatus*), which was first recorded during the 1990's, having the  
252 highest value (Fig. 4).

253

## 254 **Discussion**

255 We showed that changes in species composition caused significant shifts in the functional fingerprint of a  
256 montane bird assemblage from the western Andes of Colombia. Due mostly to species extirpations,  
257 functional space in the 2000's was considerably smaller and at least 11% different to what it was 100  
258 years before, containing fewer large-sized species, more species with high dispersal ability, and fewer  
259 habitat specialists. However, the core of functional space, which holds most of the species (~65%), has  
260 remained in the same position, suggesting a portion of the system's original functionality remains intact.  
261 On average, extirpated species had higher values of functional distinctiveness and uniqueness relative to  
262 the whole assemblage, and groups known to be globally prone to extirpation, such as large frugivores,  
263 were ranked high in uniqueness and distinctiveness. Therefore, despite the stability of the core functional  
264 space, important ecological functions performed by relatively few species may have been  
265 disproportionately affected by changes in assemblage composition.

266 We detected substantial (i.e. 30 – 60%) declines in functional richness in the San Antonio  
267 assemblage over 100 years. These values are high given that declines in functional richness in the 11-25%  
268 range are considered to cause substantial loss of functionality in highly diverse ocean and forest  
269 assemblages (Mcwilliam et al. 2018; Newbold et al. 2020; Pimiento et al. 2020), and that some systems

270 with 40% difference in tree cover, such as agriculture vs old growth forest, differ by only ~5% in the  
271 functional richness of their bird assemblages (Ikin et al. 2019). Furthermore, we found that extirpated  
272 species had higher than expected values of functional uniqueness and distinctiveness, and therefore their  
273 loss was mostly responsible for the decreasing trend in functional diversity over 100 years. The joint  
274 substantial reduction in functional diversity and loss of unique species suggests that the San Antonio  
275 assemblage has likely lost important ecological functions.

276 Our approach can enable conservation managers to move beyond simple quantifications of losses  
277 and gains through time to identify areas of functional space in need of attention owing to negative effects  
278 on ecosystem function. For example, the loss of functionally unique large frugivores from the San  
279 Antonio assemblage likely increased the potential for collapse of mutualistic networks of bird and plant  
280 species in which previous work revealed they play a critical role (Palacio et al. 2016). Loss of large  
281 frugivores can further have negative cascading effects on ecosystem health by reducing seed dispersal,  
282 affecting the survival of native trees, influencing the potential for forest regeneration, and even  
283 constraining the vegetation's ability to respond to climate change (Cordeiro & Howe 2003; Moran et al.  
284 2009; McConkey et al. 2012; Mokany et al. 2014; Ribeiro da Silva et al. 2015; Bovo et al. 2018).

285 Although the San Antonio bird assemblage has changed in functional volume, the core of its  
286 functional fingerprint (concentrating a majority of species which are arguably functionally redundant) has  
287 retained its position. High functional redundancy may be just as important as richness extending to the  
288 periphery of functional space for ecosystem health, being one of the mechanisms helping to maintain high  
289 diversity and ecosystem function (Wohl et al. 2004), reducing negative effects of natural enemies of  
290 species (Philpot et al. 2012), and facilitating niche packing within assemblages (Ricklefs 2012; Pigot et  
291 al. 2016; Cooke et al. 2019a). Our finding that the core of the San Antonio bird assemblage has seemingly  
292 not lost functions nor shifted in position suggests that there are still important attributes of the system's  
293 functionality that mirror the pre-disturbance assemblage of 100+ years ago. Hopefully, given the right  
294 conditions (i.e. time, continued forest recovery and increased connectivity between remaining forest

295 fragments), San Antonio may still recover more of its lost functionality provided by extirpated species,  
296 some of which are still found in the wider region (Palacio et al. 2016, 2019).

297 Our study provides the first example of an assessment of temporal changes in functional  
298 fingerprints from a highly diverse tropical ecosystem, and both our findings and the methods we  
299 employed have wide applications particularly for tropical ecosystem study and conservation (Stroud &  
300 Thompson 2019). For instance, restoration objectives aimed at replicating previous states of a system,  
301 could use measures of functional fingerprints to quantify how much change is needed and to direct efforts  
302 to areas of functional space in particular need of recovery (Meli et al. 2014). Similarly, conservation  
303 actions aimed at maintaining or recovering functionality can use functional fingerprints to assess routes to  
304 recovery and to prioritize species with a particular combination of traits which should be preserved or  
305 potentially re-introduced (Chazdon 2008). Future studies could explore whether the San Antonio  
306 functional fingerprints can be used as a basis for comparison to other tropical localities lacking long-term  
307 data (Stroud & Thompson 2019), and other historical surveys (e.g. Miller et al. 1957) can be used to carry  
308 out comparisons over larger scales.

309 Certain species traits, such as being large, specialized, social, having low dispersal ability and  
310 being at the top end of food webs, make animal species more vulnerable to local extirpation (Kattan et al.  
311 1994; Davies et al. 2000; Pearson et al. 2009; Habel et al. 2019). Our results highlight that some of these  
312 traits, namely body size, dispersal ability and habitat breadth, are responsible for ~78% of the variation in  
313 functional diversity within a tropical bird assemblage. This means that species with trait values at the  
314 extremes of these axes of variation (size, dispersal and habitat specialization) likely also account for a  
315 large proportion of the functional richness and dispersion in ecological assemblages. Thus, when a system  
316 loses species at the extremes of these axes, it likely also loses unique functionality. In San Antonio, the  
317 extirpation of species combining some of these traits associated with vulnerability resulted in significant  
318 decreases in functional richness and dispersion, hence arguably making the assemblage less healthy and  
319 potentially more susceptible to further changes (Mouillot et al. 2013). In agreement with our results,

320 species vulnerability to extinction is positively correlated to functional uniqueness and specialization in a  
321 wide range of organisms (Pimienta et al. 2020), and the functions provided by these unique species may  
322 be particularly prone to disappear (Mouillot et al. 2013; Teichert et al. 2017). Therefore, conservation  
323 efforts aimed at maintaining ecosystem health must move beyond just maintaining species numbers to  
324 designing strategies for the maintenance of ecological function by identifying and conserving species with  
325 traits conferring high vulnerability (Cadotte et al. 2011; McConkey et al. 2012; Pimienta et al. 2020).

326

## 327 **References**

- 328 BirdLife International. 2018. IUCN Red List of Threatened Species 2018. Available from  
329 <https://www.iucnredlist.org/species>.
- 330 Blonder B, Harris DJ. 2019. hypervolume: High Dimensional Geometry and Set Operations Using Kernel  
331 Density Estimation, Support Vector Machines, and Convex Hulls. R package version 2.0.12.  
332 Available from <https://cran.r-project.org/package=hypervolume>.
- 333 Bovo AAA, Ferraz KMPMB, Magioli M, Alexandrino ER, Hasui É, Ribeiro MC, Tobias JA. 2018.  
334 Habitat fragmentation narrows the distribution of avian functional traits associated with seed  
335 dispersal in tropical forest. *Perspectives in Ecology and Conservation* **16**:90–96.
- 336 Bregman TP, Lees AC, MacGregor HEA, Darski B, de Moura NG, Aleixo A, Barlow J, Tobias JA. 2016.  
337 Using avian functional traits to assess the impact of land-cover change on ecosystem processes  
338 linked to resilience in tropical forests. *Proceedings of the Royal Society B: Biological Sciences* **283**.
- 339 Cadotte MW, Carscadden K, Mirotnick N. 2011. Beyond species: functional diversity and the  
340 maintenance of ecological processes and services. *Journal of Applied Ecology* **48**:1079–1087.
- 341 Carmona CP, Bello F De, Mason NWH, Leps J. 2016. Traits without borders: Integrating functional  
342 diversity across scales. *Trends in ecology & evolution* **31**:382–394.

- 343 Carmona CP, de Bello F, Mason NWH, Leps J. 2019. Trait probability density (TPD): measuring  
344 functional diversity across scales based on TPD with R. *Ecology* **100**:e02876.
- 345 Chalmandrier L, Münkemüller T, Devictor V, Lavergne S, Thuiller W. 2015. Decomposing changes in  
346 phylogenetic and functional diversity over space and time. *Methods in Ecology and Evolution*  
347 **6**:109–118.
- 348 Chapman FM. 1917. The distribution of bird life in Colombia. *Bulletin of the American Museum of*  
349 *Natural History* **36**:1–169.
- 350 Chazdon RL. 2008. Beyond Deforestation: Restoring Degraded Lands. *Science* **320**:1458–1460.
- 351 Clavel J, Julliard R, Devictor V. 2011. Worldwide decline of specialist species: toward a global functional  
352 homogenization? *Frontiers in Ecology and Environment* **9**:222–228.
- 353 Cooke RSC, Bates AE, Eigenbrod F. 2019a. Global trade-offs of functional redundancy and functional  
354 dispersion for birds and mammals. *Global Ecology and Biogeography* **28**:484–495.
- 355 Cooke RSC, Eigenbrod F, Bates AE. 2019b. Projected losses of global mammal and bird ecological  
356 strategies. *Nature Communications* **10**:2279. Springer US.
- 357 Cordeiro NJ, Howe HF. 2003. Forest fragmentation severs mutualism between seed dispersers and an  
358 endemic African tree. *Proceedings of the National Academy of Sciences of the United States of*  
359 *America* **100**:14052–14056.
- 360 Davies KF, Margules CR, Lawrence JF. 2000. Which traits of species predict population declines in  
361 experimental forest fragments? *Ecology* **81**:1450–1461.
- 362 Dirzo R, Young HS, Galetti M, Ceballos G, Isaac NJB, Collen B. 2014. Defaunation in the  
363 Anthropocene. *Science* **345**:401–406.
- 364 Duong T. 2019. ks: Kernel Smoothing. R package version 1.11.6. Available from <https://cran.r->



- 365 [project.org/package=ks](https://project.org/package=ks).
- 366 Freeman BG, Scholer MN, Ruiz-Gutierrez V, Fitzpatrick JW. 2018. Climate change causes upslope shifts  
367 and mountaintop extirpations in a tropical bird community. *PNAS* **115**:11982–11987.
- 368 Funk JL, Larson JE, Ames GM, Butterfield BJ, Cavender-Bares J, Firn J, Laughlin DC, Sutton-Grier AE,  
369 Williams L, Wright J. 2017. Revisiting the Holy Grail: using plant functional traits to understand  
370 ecological processes. *Biological Reviews* **92**:1156–1173.
- 371 Gregory RD, van Strien A. 2010. Wild bird indicators : using composite population trends of birds as  
372 measures of environmental health. *Ornithological Science* **9**:3–22.
- 373 Grenié M, Violle C, Denelle P, Tucker CM, Munoz F. 2017. funrar: An R package to characterize  
374 functional rarity. *Diversity and Distributions* **23**:1365–1371.
- 375 Habel JC, Tobias JA, Fischer C. 2019. Movement ecology of Afrotropical birds : Functional traits provide  
376 complementary insights to species identity. *Biotropica*:1–9.
- 377 Ikin K, Barton PS, Blanchard W, Crane M, Stein J, Lindenmayer DB. 2019. Avian functional responses  
378 to landscape recovery. *Proceedings of the Royal Society B: Biological Sciences* **286**:20190114.
- 379 Jarzyna MA, Jetz W. 2017. A near half-century of temporal change in different facets of avian diversity.  
380 *Global Change Biology* **23**:2999–3011.
- 381 Jarzyna MA, Jetz W. 2018. Taxonomic and functional diversity change is scale dependent. *Nature*  
382 *Communications* **9**. Springer US.
- 383 Kattan GH, Alvarez-Lopez H, Giraldo M. 1994. Forest fragmentation and bird extinctions: San Antonio  
384 eighty years later. *Conservation Biology* **8**:138–146.
- 385 Kuebbing SE, Maynard DS, Bradford MA. 2018. Linking functional diversity and ecosystem processes:  
386 A framework for using functional diversity metrics to predict the ecosystem impact of functionally

- 387 unique species. *Journal of Ecology* **106**:687–698.
- 388 Laliberte E, Legendre P. 2010. A distance-based framework for measuring functional diversity from  
389 multiple traits. *Ecology* **91**:299–305.
- 390 Laliberté E, Legendre P, Shipley B. 2014. FD: measuring functional diversity from multiple traits, and  
391 other tools for functional ecology. R package version 1.0-12.
- 392 Maglianesi MA, Blüthgen N, Böhning-Gaese K, Schleuning M. 2015. Functional structure and  
393 specialization in three tropical plant-hummingbird interaction networks across an elevational  
394 gradient in Costa Rica. *Ecography* **38**:1119–1128.
- 395 Mason NWH, Mouillot D, Lee WG, Wilson JB. 2005. Functional richness, functional and functional  
396 evenness divergence: the primary of functional components diversity. *Oikos* **111**:112–118.
- 397 McConkey KR, Prasad S, Corlett RT, Campos-Arceiz A, Brodie JF, Rogers H, Santamaria L. 2012. Seed  
398 dispersal in changing landscapes. *Biological Conservation* **146**:1–13.
- 399 Mcwilliam M, Hoogenboom MO, Baird AH, Kuo C, Madin JS. 2018. Biogeographical disparity in the  
400 functional diversity and redundancy of corals. *PNAS* **115**:3084–3089.
- 401 Meli P, Benayas JMR, Balvanera P, Ramos MM. 2014. Restoration enhances wetland biodiversity and  
402 ecosystem service supply, but results are context-dependent: A meta-analysis. *PLoS ONE* **9**.
- 403 Miller AH. 1963. Seasonal activity and ecology of the avifauna of an American equatorial cloud forest.  
404 University of California Publications in Zoology **66**:1–78.
- 405 Miller AH, Friedmann H, Griscom L, Moore RT. 1957. Distributional check-list of the birds of Mexico.  
406 Part II. Pacific Coast Avifauna **33**:435.
- 407 Mokany K, Prasad S, Westcott DA. 2014. Loss of frugivore seed dispersal services under climate change.  
408 *Nature Communications* **5**:1–7.

- 409 Moran C, Catterall CP, Kanowski J. 2009. Reduced dispersal of native plant species as a consequence of  
410 the reduced abundance of frugivore species in fragmented rainforest. *Biological Conservation*  
411 **142**:541–552.
- 412 Mouillot D et al. 2013. Rare Species Support Vulnerable Functions in High-Diversity Ecosystems. *PLoS*  
413 *Biology* **11**.
- 414 Newbold T, Bentley LF, Hill SLL, Edgar MJ, Horton M, Su G, Şekercioğlu ÇH, Collen B, Purvis A.  
415 2020. Global effects of land use on biodiversity differ among functional groups. *Functional*  
416 *Ecology*:1–10.
- 417 Palacio RD, Kattan GH, Pimm SL. 2019. 100 years of land-use change have produced bird extirpations  
418 and abundance declines in an Andean mountain site. *Conservation Biology* **00**:1–11.
- 419 Palacio RD, Valderrama-Ardila C, Kattan GH. 2016. Generalist Species Have a Central Role In a Highly  
420 Diverse Plant-Frugivore Network. *Biotropica* **48**:349–355.
- 421 Pearson DL, Anderson CD, Mitchell BR, Rosenberg MS, Navarrete R, Coopmans P. 2009. Testing  
422 Hypotheses of Bird Extinctions at Rio Palenque, Ecuador, with Informal Species Lists. *Conservation*  
423 *Biology* **24**:500–510.
- 424 Petchey OL, Evans KL, Fishburn IS, Gaston KJ. 2007. Low functional diversity and no redundancy in  
425 British avian assemblages. *Journal of Animal Ecology* **76**:977–985.
- 426 Philpot SM, Pardee GL, Gonthier DJ. 2012. Cryptic biodiversity effects: importance of functional  
427 redundancy revealed through addition of food web complexity. *Ecology* **93**:992–1001.
- 428 Pigot AL, Sheard C, Miller ET, Bregman TP, Freeman BG, Roll U, Seddon N, Trisos CH, Weeks BC,  
429 Tobias JA. 2020. Macroevolutionary convergence connects morphological form to ecological  
430 function in birds. *Nature Ecology & Evolution* **4**:230–239.
- 431 Pigot AL, Trisos CH, Tobias JA, Pigot AL. 2016. Functional traits reveal the expansion and packing of

- 432 ecological niche space underlying an elevational diversity gradient in passerine birds. *Proceedings*  
433 of the Royal Society B: Biological Sciences **283**:201552013.
- 434 Pimiento C, Leprieur F, Silvestro D, Lefcheck JS, Albouy C, Rasher DB, Davis M, Svenning JC, Griffin  
435 JN. 2020. Functional diversity of marine megafauna in the Anthropocene. *Science Advances*  
436 **6**:eaay7650.
- 437 Purschke O, Schmid BC, Sykes MT, Poschod P, Michalski SG, Durka W, Kühn I, Winter M, Prentice  
438 HC. 2013. Contrasting changes in taxonomic, phylogenetic and functional diversity during a long-  
439 term succession: Insights into assembly processes. *Journal of Ecology* **101**:857–866.
- 440 R Development Core Team. 2019. R: A language and environment for statistical computing. R  
441 Foundation for Statistical Computing. <http://www.rproject.org>, Vienna, Austria.
- 442 Renjifo LM. 1999. Composition changes in a subandean avifauna after long-term forest fragmentation.  
443 *Conservation Biology* **13**:1124–1139.
- 444 Ribeiro da Silva F, Montoya D, Furtado R, Memmott J, Pizo MA, Rodrigues RR. 2015. The restoration of  
445 tropical seed dispersal networks. *Restoration Ecology* **23**:852–860.
- 446 Ricklefs RE. 2012. Species richness and morphological diversity of passerine birds **2012**:1–6.
- 447 Robinson WD. 1999. Long-Term Changes in the Avifauna of Barro Colorado Island, Panama, a Tropical  
448 Forest Isolate. *Conservation Biology* **13**:85–97.
- 449 Rosenberg K V et al. 2019. Decline of the North American avifauna. *Science* **1313**:1–10.
- 450 Sheard C, Neate-Clegg MHC, Alioravainen N, Jones SEI, Vincent C, MacGregor HEA, Bregman TP,  
451 Claramunt S, Tobias JA. 2020. Ecological drivers of global gradients in avian dispersal inferred  
452 from wing morphology. *Nature Communications* **11**:2463.
- 453 Stouffer PC. 2020. Birds in fragmented Amazonian rainforest: Lessons from 40 years at the Biological

- 454 Dynamics of Forest Fragments Project. *The Condor* **122**:1–15.
- 455 Stroud JT, Thompson ME. 2019. Looking to the past to understand the future of tropical conservation:  
456 The importance of collecting basic data. *Biotropica* **51**:293–299.
- 457 Teichert N, Lepage M, Sagouis A, Borja A, Chust G, Ferreira MT, Pasquaud S, Schinegger R, Segurado  
458 P, Argillier C. 2017. Functional redundancy and sensitivity of fish assemblages in European rivers,  
459 lakes and estuarine ecosystems. *Scientific Reports* **7**:17611.
- 460 Van de Perre F, Willig MR, Presley SJ, Mukinzi JJ-C, Gambalemoke S, Leirs H, Verheyen E. 2020.  
461 Functional volumes, niche packing and species richness: biogeographic legacies in the Congo Basin.  
462 *Royal Society Open Science* **7**:191582.
- 463 Villeger S, Mason NWH, Mouillot D. 2008. New multidimensional functional diversity indices for a  
464 multifaceted framework in functional ecology. *Ecology* **89**:2290–2301.
- 465 Violle C, Navas M, Vile D, Kazakou E, Fortunel C. 2007. Let the concept of trait be functional! *Oikos*  
466 **116**:882–892.
- 467 Wohl D, Arora S, Gladstone JR. 2004. Functional redundancy supports biodiversity and ecosystem  
468 function in a closed and constant environment. *Ecology* **85**:1534–1540.
- 469

470 **Tables and Figures**

471 **Table 1.** Values of functional richness and functional dispersion estimated for two possible Scenarios of  
472 changes in species assemblages during 100 years in San Antonio – Colombia.

| Period | Functional Richness       |                         | Functional Dispersion |             |
|--------|---------------------------|-------------------------|-----------------------|-------------|
|        | Scenario 1 <sup>a</sup>   | Scenario 2 <sup>b</sup> | Scenario 1            | Scenario 2  |
| 1910's | 0.60                      | 1.00                    | 2.39                  | 2.45        |
| 1950's | 0.24 (- 36%) <sup>c</sup> | 0.41 (- 59%)            | 2.19 (- 8%)           | 2.28 (- 7%) |
| 1990's | 0.28 (+ 4%)               | 0.34 (- 7%)             | 2.27 (+ 3%)           | 2.32 (+ 2%) |
| 2000's | 0.46 (+ 18%)              | 0.46 (+ 12%)            | 2.35 (+ 3%)           | 2.35 (+ 2%) |

<sup>a</sup> Scenario 1 assumes there were novel species which joined the assemblage as well as extirpations and re-colonizations.

<sup>b</sup> Scenario 2 assumes there were no novel species, just extirpations and re-colonizations.

<sup>c</sup> Numbers are estimates for each time period and in parenthesis the equivalent change from the previous period as a percentage.

473

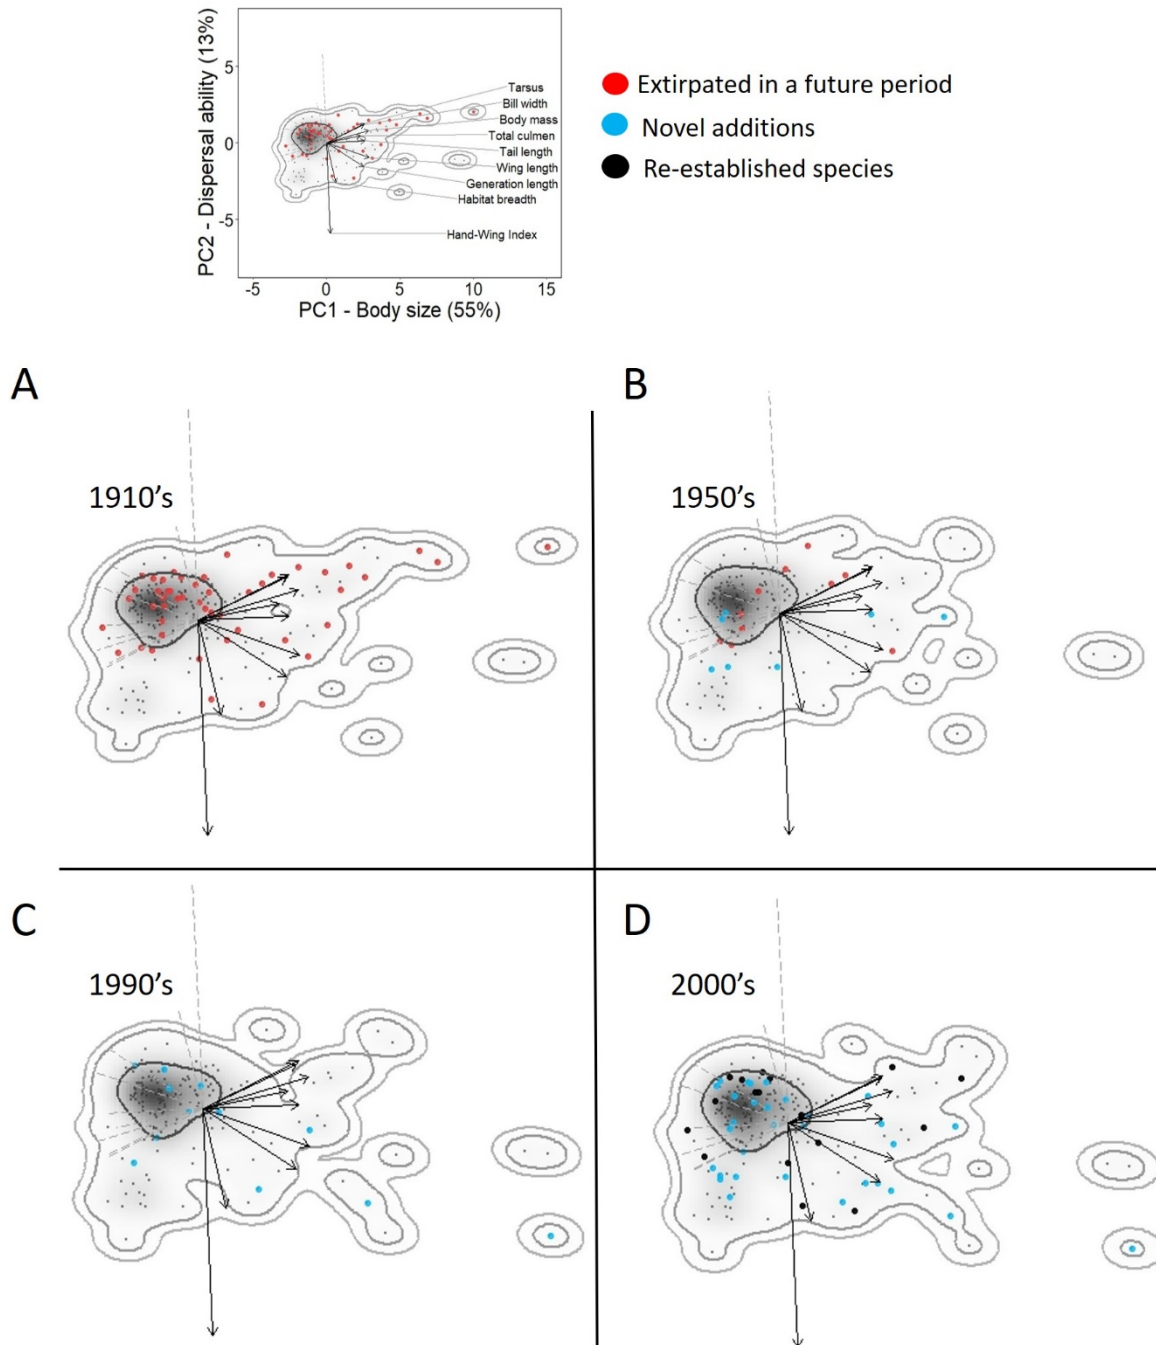

474

475 **Figure 1.** Species extirpations, novel additions and re-establishments have caused changes in the shape  
476 and extent of the functional space of the San Antonio avian assemblage in 100+ years, but the centroid of  
477 trait space (gray shading) has not shifted. Two-dimensional functional space is represented by PC scores  
478 of functional traits during 4 time periods (A-D). PC1 reflects largely variation in body size whereas PC2

479 correlates with dispersal ability of birds and habitat breadth. Small dots are species present in each time  
480 period, with larger red dots representing species which became extirpated in a future period and larger  
481 blue dots representing new additions which were absent in previous periods. In **D**, the larger black dots  
482 are species which re-established populations after being extirpated. Arrows are scaled to represent the  
483 loadings and direction of each trait in functional space and the insert above shows the scale and the traits  
484 represented by each arrow. Gray shading represents the kernel density estimates for each time period and  
485 curved lines show the 50, 95 and 99% probability contours.

486



487

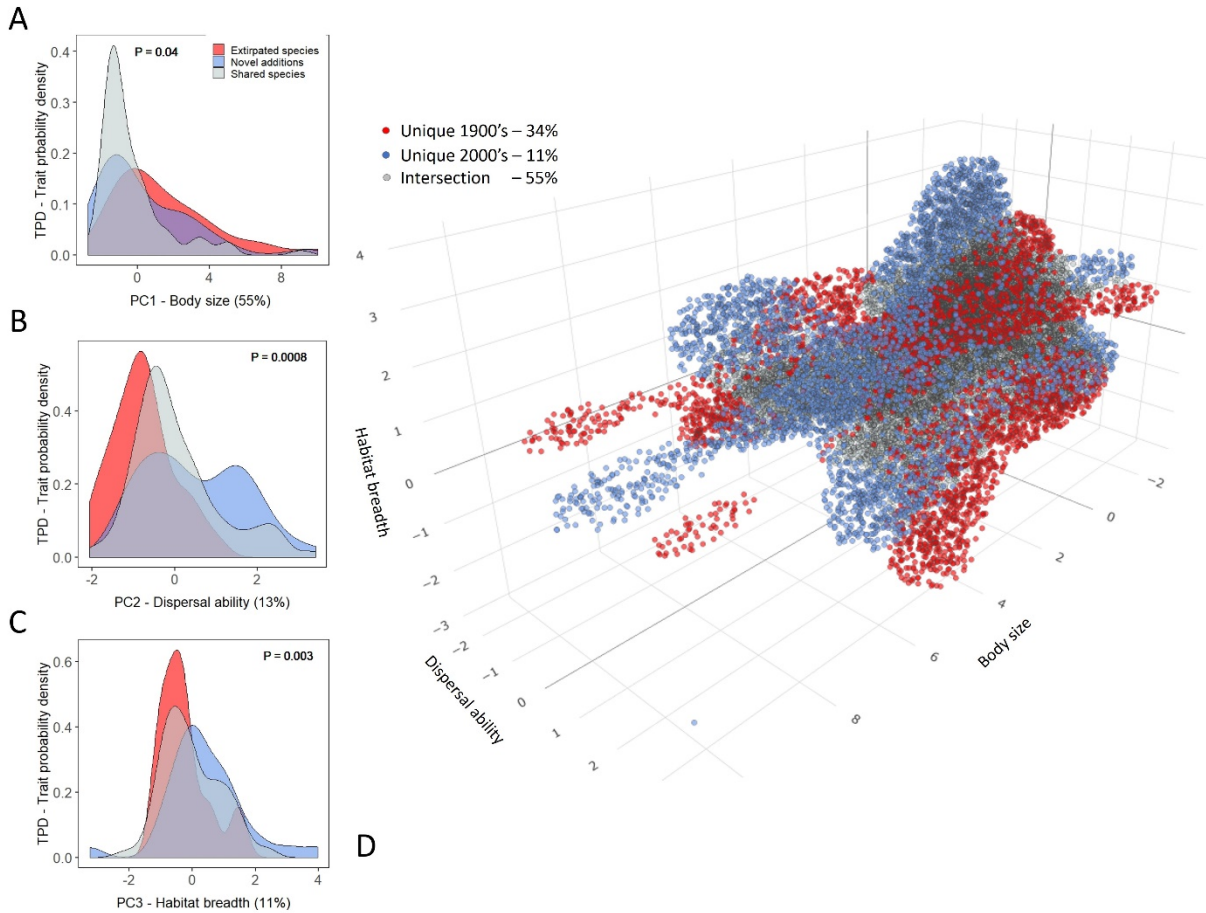

488

489 **Figure 2.** Probability density curves of extirpated species and novel additions to the avifauna between  
490 1910's and 2000's (Scenario 1), show that San Antonio's functional fingerprint has shifted towards **A.**  
491 Smaller birds, **B.** Species with higher dispersal ability and **C.** Species with wider habitat breadths. *P*  
492 values were obtained through Kolmogorov-Smirnov tests comparing the distributions of extirpated and  
493 novel species. **D.** An overlap of the 9-dimension hypervolumes of the 1900's and 2000's suggests that  
494 35% of the volume occupied in 1910's (in red) has been lost and replaced by 11% of new functional  
495 space (in blue) provided by the novel additions to the San Antonio assemblage during the 2000's. 55% of  
496 the functional hypervolume has remained constant in time. Only the first 3 dimensions are used for  
497 visualization.

498

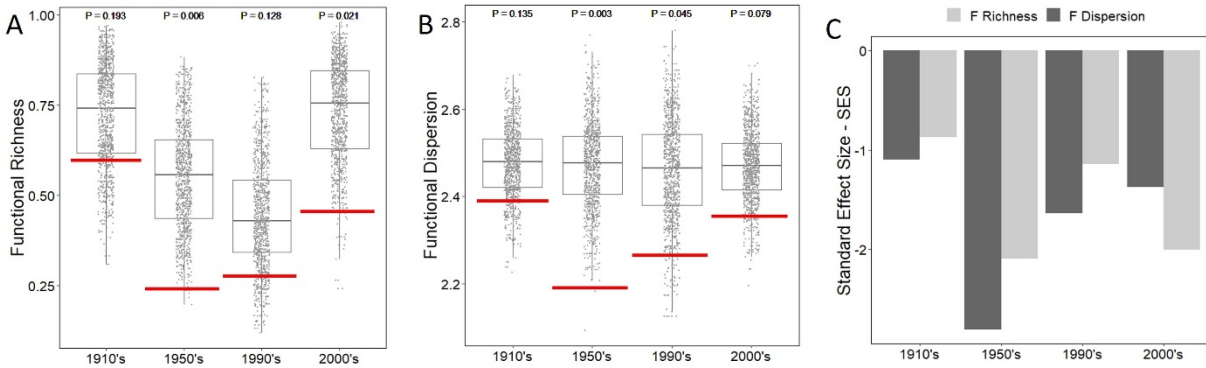

499

500 **Figure 3.** Functional richness (A), and dispersion (B) decreased significantly between the 1910's and the  
501 1950's, appeared to increase slightly thereafter until the 1990's and then increased significantly until the  
502 2000's. Red lines show the empirical values of functional richness and dispersion estimated for each time  
503 period, and boxplots show the distribution of these values generated by 999 iterations of a null model  
504 with randomized species identities. Deviance from random expectation, measured as standard effect sizes  
505 (C) were all negative suggesting that the assemblages at different time periods have lower than expected  
506 values of functional richness and dispersion, i.e. extirpated species were more functionally unique than  
507 expected by chance.

508

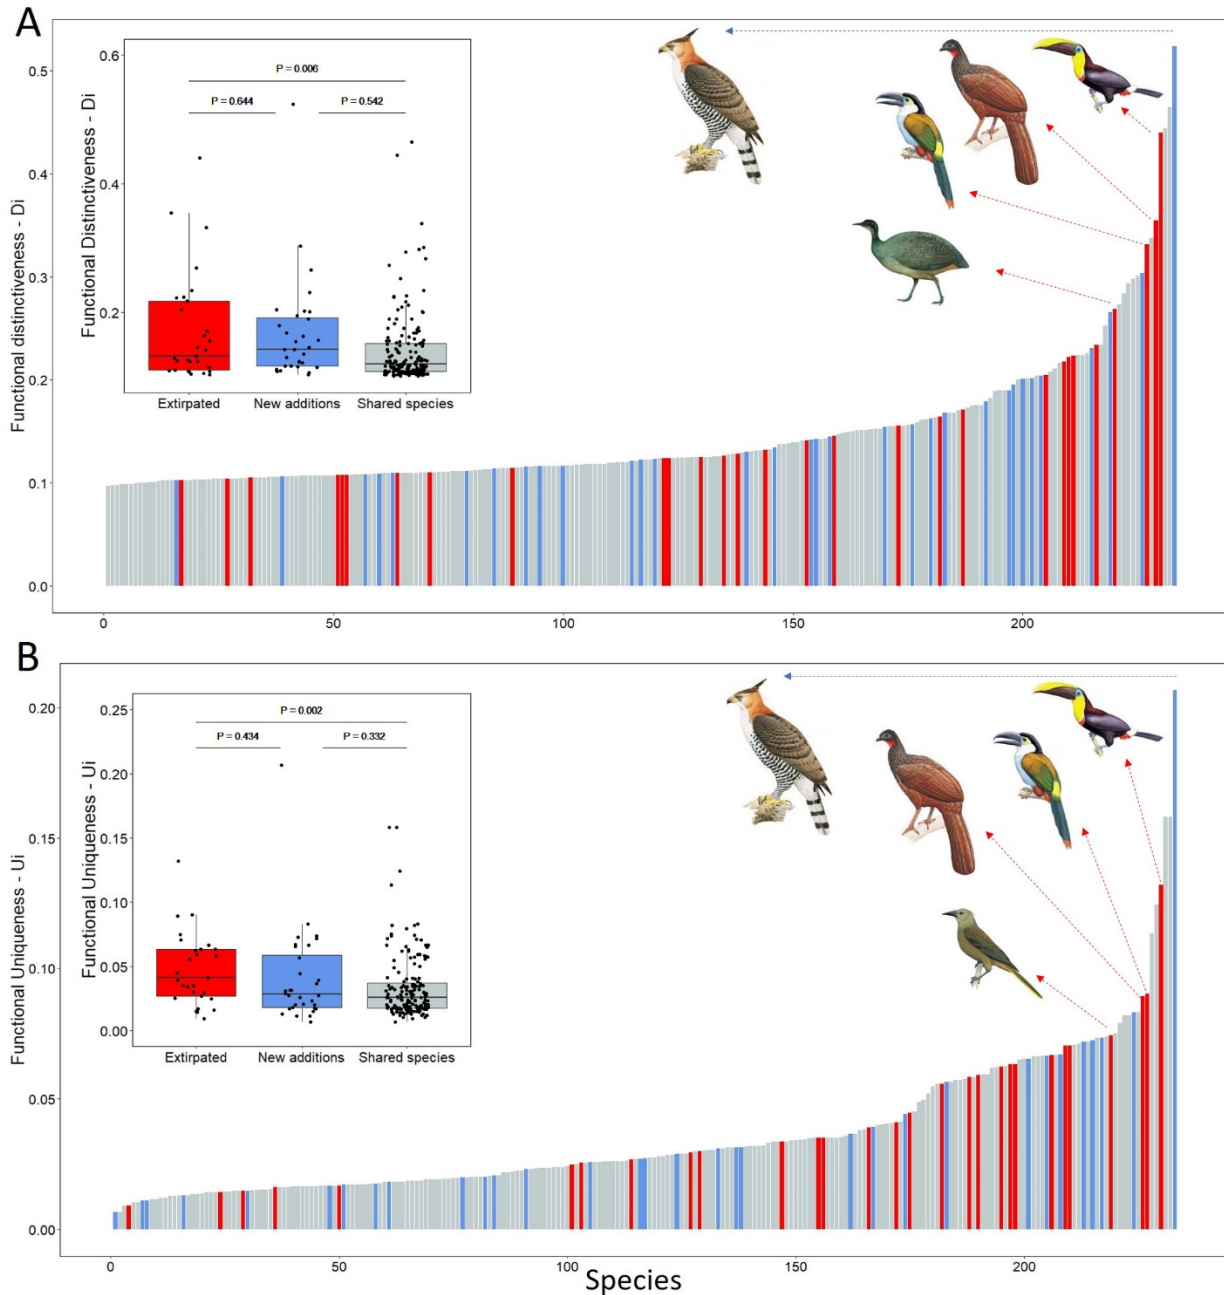

509

510 **Figure 4.** Both extirpated species and novel additions to the San Antonio assemblage had  
511 higher functional distinctiveness (**A.**  $P_{ext} = 0.009$ ,  $P_{new} = 0.002$ ) and uniqueness (**B.**  $P_{ext} = 0.002$ ,  $P_{new} =$   
512  $0.017$ ), than expected by chance. Differences between pairs of groups were only significant between  
513 extirpated and shared species. The highest ranked extirpated species are all large frugivores, but the

514 species with the highest rank is the Ornate Hawk-eagle, a novel addition which appeared in the 1990's in  
515 San Antonio.

### 516 **Supporting information**

517 Appendix S1 contains the complete trait dataset used in this study plus the PC scores and the values of  
518 functional Uniqueness and Distinctiveness estimated for each species. Appendix S2 contains the R code  
519 used for all analyses, and Appendix S3 contains supplementary methods, tables and figures.

520

521 **Appendix S3.** Supplementary methods, figures and tables.

522 **Functional trait dataset.-** Our trait dataset contains a combination of measurements taken from almost  
523 1900 bird specimens housed at seven ornithological collections in Colombia, compiled mainly by  
524 Montoya et al. (2018) and complemented with secondary information from other published trait datasets  
525 (Claramunt et al. 2012; Cooke et al. 2019; Pigot et al. 2020). For 93 species which did not have complete  
526 information, we measured additional specimens (see acknowledgements). Where possible, at least 2  
527 males and 2 females of each species were measured (mean = 8, range = 1 - 124 individuals). Habitat  
528 breadth (the number of habitats listed in IUCN accounts) and generation time (years), were extracted from  
529 the IUCN List of Threatened Species accounts (BirdLife International 2018). Mean trait values for each  
530 species were estimated and used in all subsequent analyses. The impact of measurement error due to  
531 multiple observers on our analysis is negligible due to the large disparity in body sizes in our dataset (eg.  
532 *Coragyps atratus* ~1,600 g vs. *Ocreatus underwoodii* ~2,5 g).

533 **Historical changes in the San Antonio Avifauna.-** The original avifauna, which contained 201 species  
534 in the 1910's, suffered the extirpation of 47 species between the 1930's and 1990's due to extensive forest  
535 fragmentation and hunting (Kattan et al. 1994). However, 17 species were reestablished in the 2000's  
536 after forest regeneration (Palacio et al. 2019). Additionally, since the 1990's the site has been colonized  
537 by 32 species not recorded in the 1910's (Kattan et al. 1994; Palacio et al. 2019). Large canopy  
538 frugivores, understory insectivores, habitat specialists and species at their elevational limits were more  
539 prone to extirpation in San Antonio (Kattan et al. 1994), in agreement with work in other tropical areas  
540 experiencing forest fragmentation (Renjifo 1999; Sodhi et al. 2006; Ferraz et al. 2007; Pearson et al.  
541 2009; Stouffer 2020).

542

543 **Supplementary Table S3.1.** Summary of PCA showing standard deviation, variance explained and  
 544 loadings for 9 PC axes. 79% of the variation in functional traits was explained by the first 3 PC. PC1  
 545 describes body size, PC2 dispersal ability and PC3 habitat breadth.

|                        | <b>PC1</b> | <b>PC2</b>   | <b>PC3</b>   | <b>PC4</b> | <b>PC5</b> | <b>PC6</b> | <b>PC7</b> | <b>PC8</b> | <b>PC9</b> |
|------------------------|------------|--------------|--------------|------------|------------|------------|------------|------------|------------|
| Standard deviation     | 2.23       | 1.09         | 0.98         | 0.90       | 0.64       | 0.54       | 0.45       | 0.35       | 0.28       |
| Proportion of variance | 0.55       | 0.13         | 0.11         | 0.09       | 0.05       | 0.03       | 0.02       | 0.01       | 0.01       |
| Cumulative proportion  | 0.55       | 0.68         | 0.79         | 0.88       | 0.92       | 0.96       | 0.98       | 0.99       | 1.00       |
| <b>Loadings</b>        | <b>PC1</b> | <b>PC2</b>   | <b>PC3</b>   | <b>PC4</b> | <b>PC5</b> | <b>PC6</b> | <b>PC7</b> | <b>PC8</b> | <b>PC9</b> |
| Weight                 | 0.41       | 0.12         |              | 0.22       |            | 0.11       | 0.58       | 0.20       | 0.62       |
| Bill length            | 0.33       |              |              | -0.66      |            | 0.44       | -0.32      | 0.37       | 0.12       |
| Bill width             | 0.36       | 0.17         | -0.19        | -0.48      |            | -0.25      | 0.41       | -0.53      | -0.24      |
| Wing length            | 0.41       | -0.14        | 0.12         | 0.22       |            |            | 0.22       | 0.47       | -0.69      |
| Tail length            | 0.37       |              |              | 0.17       | -0.71      | -0.41      | -0.37      |            | 0.16       |
| Tarsus                 | 0.37       | 0.18         |              | 0.39       | 0.14       | 0.56       | -0.28      | -0.49      | -0.11      |
| HWI                    |            | <b>-0.85</b> | 0.31         | -0.15      | -0.19      | 0.20       | 0.13       | -0.26      |            |
| Habitat breadth        |            | -0.37        | <b>-0.89</b> | 0.20       |            |            |            |            |            |
| Generation time        | 0.36       | -0.22        | 0.17         |            | 0.65       | -0.46      | -0.35      |            | 0.16       |

546

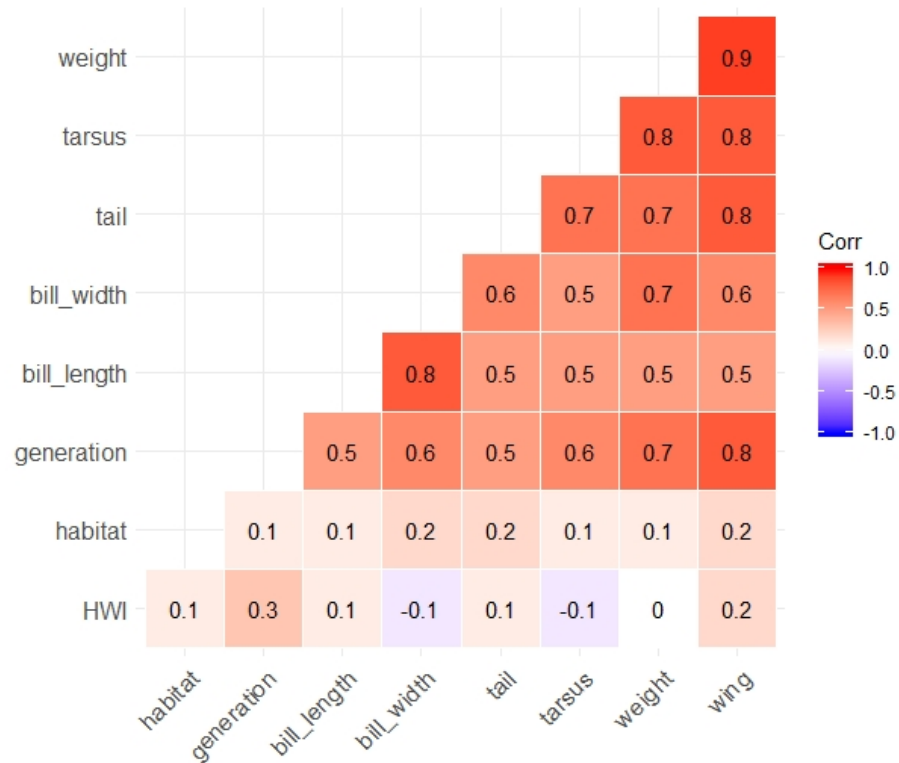

547

548 **Figure S3.1.** Correlation matrix of the 9 functional traits used in this study. 72% of our traits have

549 correlation values equal to or below  $\pm 0.6$ .

550

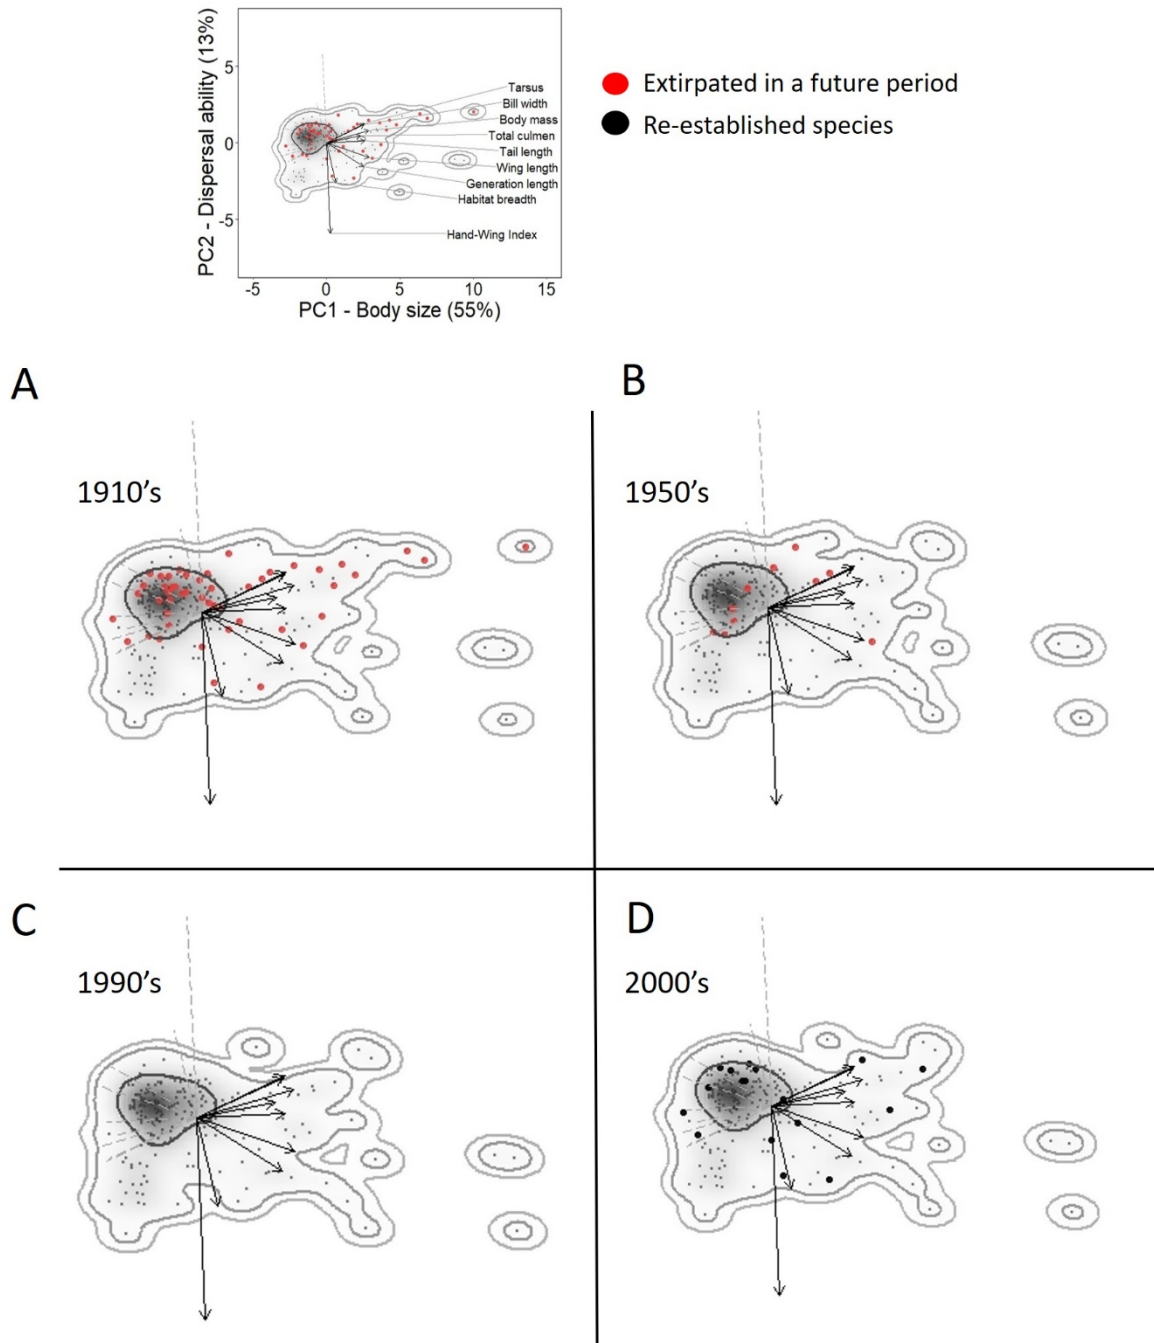

551

552 **Figure S3.2.** Species extirpations and re-establishments (Scenario 2) have caused changes in the shape  
553 and extent of the functional space of San Antonio in 100 years, but the centroid of trait space (gray  
554 shading) has not shifted. Two-dimensional functional space is represented by PC scores of functional  
555 traits during 4 time periods (A-D). PC1 reflects largely variation in body size while PC2 correlates with



556 dispersal ability of birds and habitat breadth. Small dots are species present in each time period, with  
557 larger red dots representing species which became extirpated in a future period and larger black dots are  
558 species which re-established populations after being extirpated. Arrows are scaled to represent the  
559 loadings and direction of each trait in functional space and the insert above shows the scale and the traits  
560 represented by each arrow. Gray shading represents the kernel density estimates for each time period and  
561 curved lines show the 50, 95 and 99% probability contours.

562

563

564

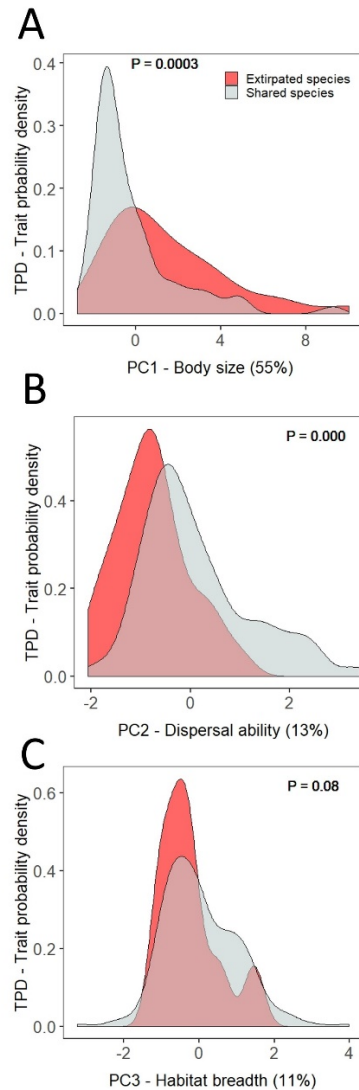

565

566 **Figure S3.3.** Under Scenario 2, assuming there were no novel species joining the San Antonio bird  
567 assemblage, the probability density curves of extirpated species between 1910's and 2000's, show that the  
568 functional fingerprint has shifted towards **A.** Smaller birds, and **B.** Species with higher dispersal ability.  
569 **C.** Contrasting with scenario 1, in scenario 2 species habitat breadths did not change significantly as a  
570 consequence of species extirpations. *P* values were obtained through Kolmogorov-Smirnov tests  
571 comparing the distributions.

572

573 **References**

- 574 BirdLife International. 2018. IUCN Red List of Threatened Species 2018. Available from  
575 <https://www.iucnredlist.org/species>.
- 576 Claramunt S, Elizabeth P, Jr JVR, Brumfield RT. 2012. High dispersal ability inhibits speciation in a  
577 continental radiation of passerine birds. *Proceedings of the Royal Society B: Biological Sciences*  
578 **279**:1567–1574.
- 579 Cooke RSC, Eigenbrod F, Bates AE. 2019. Projected losses of global mammal and bird ecological  
580 strategies. *Nature Communications* **10**:2279. Springer US.
- 581 Ferraz G, Nichols JD, Hines JE, Stouffer PC, Jr ROB, Lovejoy TE. 2007. A Large-Scale Deforestation  
582 and Isolation experiment: Effects of patch area and isolation on Amazon Birds. *Science* **315**:238–  
583 242.
- 584 Kattan GH, Alvarez-Lopez H, Giraldo M. 1994. Forest fragmentation and bird extinctions: San Antonio  
585 eighty years later. *Conservation Biology* **8**:138–146.
- 586 Montoya P et al. 2018. A morphological database for 606 Colombian bird species. *Ecology* **99**:1693.
- 587 Palacio RD, Kattan GH, Pimm SL. 2019. 100 years of land-use change have produced bird extirpations  
588 and abundance declines in an Andean mountain site. *Conservation Biology* **00**:1–11.
- 589 Pearson DL, Anderson CD, Mitchell BR, Rosenberg MS, Navarrete R, Coopmans P. 2009. Testing  
590 Hypotheses of Bird Extinctions at Rio Palenque, Ecuador, with Informal Species Lists. *Conservation*  
591 *Biology* **24**:500–510.
- 592 Pigot AL, Sheard C, Miller ET, Bregman TP, Freeman BG, Roll U, Seddon N, Trisos CH, Weeks BC,  
593 Tobias JA. 2020. Macroevolutionary convergence connects morphological form to ecological  
594 function in birds. *Nature Ecology & Evolution* **4**:230–239.

- 595 Renjifo LM. 1999. Composition changes in a subandean avifauna after long-term forest fragmentation.  
596 Conservation Biology **13**:1124–1139.
- 597 Sodhi NS, Lee TM, Koh LPIN, Prawiradilaga DM. 2006. Long-Term Avifaunal Impoverishment in an  
598 Isolated Tropical Woodlot. Conservation Biology **20**:772–779.
- 599 Stouffer PC. 2020. Birds in fragmented Amazonian rainforest: Lessons from 40 years at the Biological  
600 Dynamics of Forest Fragments Project. The Condor **122**:1–15.
- 601
